# Supplementary material for: The Lexicocalorimeter: Gauging public health through caloric input and output on social media
Source: PubMed Central journal article supplement (PMC5302853; doi:10.1371/journal.pone.0168893), 2017-02-10
Supplement: pone.0168893.s009.pdf [file pone.0168893.s009.pdf]

| Health and/or well-being quantity                                  | $\hat{\rho}_s$ for $C_{diff}$ | $q$ -val               | $\hat{\rho}_s$ for $C_{in}$ | $q$ -val               | $\hat{\rho}_s$ for $C_{out}$ | $q$ -val               |
|--------------------------------------------------------------------|-------------------------------|------------------------|-----------------------------|------------------------|------------------------------|------------------------|
| 1. % no physical activity in past 30 days [24]                     | -0.79                         | $1.77 \times 10^{-09}$ | 0.58                        | $5.67 \times 10^{-05}$ | -0.66                        | $1.51 \times 10^{-06}$ |
| 2. % have been physically active in past 30 days [24]              | 0.79                          | $1.77 \times 10^{-09}$ | -0.57                       | $6.53 \times 10^{-05}$ | 0.67                         | $1.24 \times 10^{-06}$ |
| 3. % high blood pressure [24]                                      | -0.78                         | $2.72 \times 10^{-09}$ | 0.32                        | $4.05 \times 10^{-02}$ | -0.78                        | $2.72 \times 10^{-09}$ |
| 4. Adult diabetes rate [25]                                        | -0.76                         | $5.26 \times 10^{-09}$ | 0.29                        | $6.16 \times 10^{-02}$ | -0.77                        | $2.73 \times 10^{-09}$ |
| 5. CNBC quality of life ranking [26]                               | -0.75                         | $8.07 \times 10^{-09}$ | 0.28                        | $7.34 \times 10^{-02}$ | -0.77                        | $3.60 \times 10^{-09}$ |
| 6. % adult overweight/obesity [27]                                 | -0.73                         | $2.40 \times 10^{-08}$ | 0.55                        | $1.41 \times 10^{-04}$ | -0.59                        | $3.07 \times 10^{-05}$ |
| 7. Heart disease death rate [27]                                   | -0.73                         | $2.07 \times 10^{-08}$ | 0.34                        | $2.82 \times 10^{-02}$ | -0.73                        | $2.07 \times 10^{-08}$ |
| 8. Gallup Wellbeing score [4]                                      | 0.73                          | $3.83 \times 10^{-08}$ | -0.31                       | $4.43 \times 10^{-02}$ | 0.73                         | $3.70 \times 10^{-08}$ |
| 9. % adult obesity [25]                                            | -0.72                         | $3.70 \times 10^{-08}$ | 0.53                        | $2.26 \times 10^{-04}$ | -0.59                        | $2.94 \times 10^{-05}$ |
| 10. America's Health Rankings, overall [24]                        | -0.72                         | $3.93 \times 10^{-07}$ | 0.43                        | $4.74 \times 10^{-03}$ | -0.67                        | $2.77 \times 10^{-06}$ |
| 11. Life expectancy at birth [27]                                  | 0.68                          | $4.27 \times 10^{-07}$ | -0.4                        | $6.91 \times 10^{-03}$ | 0.65                         | $2.64 \times 10^{-06}$ |
| 12. % who eat fruit less than once a day [28]                      | -0.67                         | $9.44 \times 10^{-07}$ | 0.61                        | $1.38 \times 10^{-05}$ | -0.51                        | $5.23 \times 10^{-04}$ |
| 13. % child overweight/obesity [27]                                | -0.64                         | $3.03 \times 10^{-06}$ | 0.27                        | $7.55 \times 10^{-02}$ | -0.64                        | $3.06 \times 10^{-06}$ |
| 14. % who eat vegetables less than once a day [28]                 | -0.61                         | $1.38 \times 10^{-05}$ | 0.51                        | $5.21 \times 10^{-04}$ | -0.46                        | $1.57 \times 10^{-03}$ |
| 15. Median daily intake of fruits [28]                             | 0.6                           | $1.68 \times 10^{-05}$ | -0.62                       | $8.33 \times 10^{-06}$ | 0.41                         | $5.44 \times 10^{-03}$ |
| 16. Smoking rate [27]                                              | -0.6                          | $2.14 \times 10^{-05}$ | 0.51                        | $5.19 \times 10^{-04}$ | -0.48                        | $1.08 \times 10^{-03}$ |
| 17. Median household income [27]                                   | 0.51                          | $5.19 \times 10^{-04}$ | -0.53                       | $3.27 \times 10^{-04}$ | 0.4                          | $8.38 \times 10^{-03}$ |
| 18. Median daily intake of vegetables [28]                         | 0.5                           | $5.72 \times 10^{-04}$ | -0.56                       | $7.44 \times 10^{-05}$ | 0.31                         | $4.36 \times 10^{-02}$ |
| 19. Brain health ranking [29] (lower is better)                    | -0.5                          | $7.50 \times 10^{-04}$ | 0.62                        | $1.38 \times 10^{-05}$ | -0.29                        | $5.70 \times 10^{-02}$ |
| 20. % high cholesterol [24]                                        | -0.49                         | $7.88 \times 10^{-04}$ | 0.23                        | $1.45 \times 10^{-01}$ | -0.48                        | $9.05 \times 10^{-04}$ |
| 21. % with bachelor's degree or higher [6]                         | 0.47                          | $1.48 \times 10^{-03}$ | -0.54                       | $1.66 \times 10^{-04}$ | 0.33                         | $2.82 \times 10^{-02}$ |
| 22. Colorectal cancer rate [25]                                    | -0.44                         | $3.82 \times 10^{-03}$ | 0.53                        | $3.59 \times 10^{-04}$ | -0.27                        | $8.25 \times 10^{-02}$ |
| 23. US Census Gini index score [30] (lower is better)              | -0.42                         | $4.99 \times 10^{-03}$ | -0.03                       | $8.45 \times 10^{-01}$ | -0.5                         | $5.55 \times 10^{-04}$ |
| 24. Avg # poor mental health days, past 30 days [24]               | -0.42                         | $5.44 \times 10^{-03}$ | 0.12                        | $4.75 \times 10^{-01}$ | -0.48                        | $1.06 \times 10^{-03}$ |
| 25. Neuroticism Big Five personality trait [31]                    | -0.38                         | $1.13 \times 10^{-02}$ | 0.2                         | $2.03 \times 10^{-01}$ | -0.37                        | $1.42 \times 10^{-02}$ |
| 26. Binge drinking rate [24]                                       | 0.38                          | $1.32 \times 10^{-02}$ | -0.15                       | $3.56 \times 10^{-01}$ | 0.41                         | $5.84 \times 10^{-03}$ |
| 27. Avg # poor physical health days, past 30 days [24]             | -0.35                         | $2.34 \times 10^{-02}$ | 0.19                        | $2.19 \times 10^{-01}$ | -0.38                        | $1.13 \times 10^{-02}$ |
| 28. Farmers markets per 100,000 in pop. [28]                       | 0.33                          | $2.82 \times 10^{-02}$ | 0.06                        | $7.17 \times 10^{-01}$ | 0.42                         | $5.05 \times 10^{-03}$ |
| 29. Strolling of the Heifers locavore score (lower is better) [32] | -0.29                         | $6.44 \times 10^{-02}$ | -0.3                        | $5.41 \times 10^{-02}$ | -0.45                        | $2.94 \times 10^{-03}$ |
| 30. Extraversion Big Five personality trait [31]                   | -0.28                         | $6.89 \times 10^{-02}$ | 0.03                        | $8.50 \times 10^{-01}$ | -0.29                        | $5.63 \times 10^{-02}$ |
| 31. % schools offering fruit/veg at celebrations [28]              | 0.24                          | $1.26 \times 10^{-01}$ | -0.46                       | $1.96 \times 10^{-03}$ | 0.05                         | $7.90 \times 10^{-01}$ |
| 32. Openness Big Five personality trait [31]                       | 0.24                          | $1.26 \times 10^{-01}$ | -0.5                        | $6.11 \times 10^{-04}$ | 0.04                         | $8.10 \times 10^{-01}$ |
| 33. % cropland harvested for fruits/veg [28]                       | 0.19                          | $2.35 \times 10^{-01}$ | -0.62                       | $1.37 \times 10^{-05}$ | -0.04                        | $8.10 \times 10^{-01}$ |
| 34. Conscientiousness Big Five personality trait [31]              | -0.12                         | $4.62 \times 10^{-01}$ | 0.2                         | $2.10 \times 10^{-01}$ | -0.05                        | $7.93 \times 10^{-01}$ |
| 35. % census tracts, healthy food retailer within 1/2 mile [28]    | -0.02                         | $8.86 \times 10^{-01}$ | -0.52                       | $3.68 \times 10^{-04}$ | -0.24                        | $1.28 \times 10^{-01}$ |
| 36. George Mason overall freedom ranking [33] (lower is freer)     | -0.02                         | $8.88 \times 10^{-01}$ | -0.11                       | $5.15 \times 10^{-01}$ | -0.1                         | $5.64 \times 10^{-01}$ |
| 37. Agreeableness Big Five personality trait [31]                  | -0.01                         | $9.42 \times 10^{-01}$ | 0.22                        | $1.50 \times 10^{-01}$ | 0.08                         | $6.47 \times 10^{-01}$ |

**S2 Table. Identical to Tab. 1 but using a caloric difference rather than caloric ratio.** Spearman correlation coefficients,  $\hat{\rho}_s$ , and Benjamini-Hochberg  $q$ -values for caloric input  $C_{in}$ , caloric output  $C_{out}$ , and caloric difference  $C_{diff}(\alpha) = \alpha C_{out} + (1 - \alpha)C_{in}$  and demographic data related to food and physical activity, Big Five personality traits [31], health and well-being rankings by state, and socioeconomic status, correlated, ordered from strongest to weakest Spearman correlations with caloric ratio. We chose  $\alpha$  so that the average of  $C_{out}$  matched the average of  $\alpha C_{in}$ .
