# Supplementary material for: The Lexicocalorimeter: Gauging public health through caloric input and output on social media
Source: PubMed Central journal article supplement (PMC5302853; doi:10.1371/journal.pone.0168893), 2017-02-10
Supplement: pone.0168893.s010.pdf [file pone.0168893.s010.pdf]

| Health and/or well-being quantity                                  | $\hat{\rho}_s$ for $C_{diff}$ | $q$ -val               | $\hat{\rho}_s$ for $C_{in}$ | $q$ -val               | $\hat{\rho}_s$ for $C_{out}$ | $q$ -val               |
|--------------------------------------------------------------------|-------------------------------|------------------------|-----------------------------|------------------------|------------------------------|------------------------|
| 1. % no physical activity in past 30 days [24]                     | -0.78                         | $3.42 \times 10^{-09}$ | 0.58                        | $4.91 \times 10^{-05}$ | -0.66                        | $1.59 \times 10^{-06}$ |
| 2. % have been physically active in past 30 days [24]              | 0.78                          | $3.42 \times 10^{-09}$ | -0.58                       | $5.50 \times 10^{-05}$ | 0.67                         | $1.39 \times 10^{-06}$ |
| 3. % high blood pressure [24]                                      | -0.77                         | $3.60 \times 10^{-09}$ | 0.39                        | $1.16 \times 10^{-02}$ | -0.78                        | $3.42 \times 10^{-09}$ |
| 4. Heart disease death rate [27]                                   | -0.75                         | $1.09 \times 10^{-08}$ | 0.38                        | $1.24 \times 10^{-02}$ | -0.73                        | $2.07 \times 10^{-08}$ |
| 5. Adult diabetes rate [25]                                        | -0.74                         | $1.25 \times 10^{-08}$ | 0.34                        | $2.77 \times 10^{-02}$ | -0.77                        | $3.42 \times 10^{-09}$ |
| 6. CNBC quality of life ranking [26]                               | -0.74                         | $2.07 \times 10^{-08}$ | 0.33                        | $3.22 \times 10^{-02}$ | -0.77                        | $3.60 \times 10^{-09}$ |
| 7. % adult overweight/obesity [27]                                 | -0.7                          | $1.48 \times 10^{-07}$ | 0.53                        | $3.14 \times 10^{-04}$ | -0.59                        | $3.56 \times 10^{-05}$ |
| 8. Gallup Wellbeing score [4]                                      | 0.7                           | $3.08 \times 10^{-07}$ | -0.33                       | $3.38 \times 10^{-02}$ | 0.73                         | $4.35 \times 10^{-08}$ |
| 9. % adult obesity [25]                                            | -0.69                         | $3.40 \times 10^{-07}$ | 0.52                        | $4.11 \times 10^{-04}$ | -0.59                        | $3.56 \times 10^{-05}$ |
| 10. America's Health Rankings, overall [24]                        | -0.69                         | $1.39 \times 10^{-06}$ | 0.4                         | $9.14 \times 10^{-03}$ | -0.67                        | $2.77 \times 10^{-06}$ |
| 11. Life expectancy at birth [27]                                  | 0.67                          | $9.05 \times 10^{-07}$ | -0.36                       | $1.59 \times 10^{-02}$ | 0.65                         | $2.67 \times 10^{-06}$ |
| 12. % who eat fruit less than once a day [28]                      | -0.65                         | $2.67 \times 10^{-06}$ | 0.57                        | $7.45 \times 10^{-05}$ | -0.51                        | $5.89 \times 10^{-04}$ |
| 13. % child overweight/obesity [27]                                | -0.64                         | $3.06 \times 10^{-06}$ | 0.34                        | $2.78 \times 10^{-02}$ | -0.64                        | $3.06 \times 10^{-06}$ |
| 14. % who eat vegetables less than once a day [28]                 | -0.61                         | $1.54 \times 10^{-05}$ | 0.53                        | $3.14 \times 10^{-04}$ | -0.46                        | $1.69 \times 10^{-03}$ |
| 15. Median daily intake of fruits [28]                             | 0.59                          | $3.56 \times 10^{-05}$ | -0.59                       | $3.56 \times 10^{-05}$ | 0.41                         | $5.73 \times 10^{-03}$ |
| 16. Smoking rate [27]                                              | -0.59                         | $3.77 \times 10^{-05}$ | 0.47                        | $1.60 \times 10^{-03}$ | -0.48                        | $1.24 \times 10^{-03}$ |
| 17. Median daily intake of vegetables [28]                         | 0.5                           | $7.64 \times 10^{-04}$ | -0.56                       | $1.03 \times 10^{-04}$ | 0.31                         | $4.09 \times 10^{-02}$ |
| 18. Median household income [27]                                   | 0.48                          | $1.38 \times 10^{-03}$ | -0.5                        | $8.58 \times 10^{-04}$ | 0.4                          | $9.07 \times 10^{-03}$ |
| 19. % high cholesterol [24]                                        | -0.48                         | $1.28 \times 10^{-03}$ | 0.24                        | $1.15 \times 10^{-01}$ | -0.48                        | $1.05 \times 10^{-03}$ |
| 20. Colorectal cancer rate [25]                                    | -0.47                         | $1.68 \times 10^{-03}$ | 0.56                        | $1.37 \times 10^{-04}$ | -0.27                        | $8.35 \times 10^{-02}$ |
| 21. Brain health ranking [29] (lower is better)                    | -0.46                         | $1.91 \times 10^{-03}$ | 0.55                        | $1.74 \times 10^{-04}$ | -0.29                        | $5.43 \times 10^{-02}$ |
| 22. US Census Gini index score [30] (lower is better)              | -0.44                         | $3.41 \times 10^{-03}$ | 0.11                        | $5.12 \times 10^{-01}$ | -0.5                         | $6.22 \times 10^{-04}$ |
| 23. % with bachelor's degree or higher [6]                         | 0.42                          | $4.99 \times 10^{-03}$ | -0.43                       | $4.21 \times 10^{-03}$ | 0.33                         | $2.78 \times 10^{-02}$ |
| 24. Avg # poor mental health days, past 30 days [24]               | -0.39                         | $1.05 \times 10^{-02}$ | 0.1                         | $5.31 \times 10^{-01}$ | -0.48                        | $1.23 \times 10^{-03}$ |
| 25. Neuroticism Big Five personality trait [31]                    | -0.37                         | $1.30 \times 10^{-02}$ | 0.23                        | $1.35 \times 10^{-01}$ | -0.37                        | $1.42 \times 10^{-02}$ |
| 26. Extraversion Big Five personality trait [31]                   | -0.34                         | $2.78 \times 10^{-02}$ | 0.13                        | $4.13 \times 10^{-01}$ | -0.29                        | $5.36 \times 10^{-02}$ |
| 27. Farmers markets per 100,000 in pop. [28]                       | 0.33                          | $2.88 \times 10^{-02}$ | -0.01                       | $9.59 \times 10^{-01}$ | 0.42                         | $5.41 \times 10^{-03}$ |
| 28. Binge drinking rate [24]                                       | 0.33                          | $2.88 \times 10^{-02}$ | -0.12                       | $4.88 \times 10^{-01}$ | 0.41                         | $6.23 \times 10^{-03}$ |
| 29. Avg # poor physical health days, past 30 days [24]             | -0.32                         | $3.83 \times 10^{-02}$ | 0.16                        | $3.32 \times 10^{-01}$ | -0.38                        | $1.16 \times 10^{-02}$ |
| 30. Strolling of the Heifers locavore score (lower is better) [32] | -0.31                         | $4.52 \times 10^{-02}$ | -0.16                       | $3.32 \times 10^{-01}$ | -0.45                        | $3.16 \times 10^{-03}$ |
| 31. % schools offering fruit/veg at celebrations [28]              | 0.25                          | $1.13 \times 10^{-01}$ | -0.38                       | $1.36 \times 10^{-02}$ | 0.05                         | $7.75 \times 10^{-01}$ |
| 32. Openness Big Five personality trait [31]                       | 0.23                          | $1.30 \times 10^{-01}$ | -0.42                       | $5.43 \times 10^{-03}$ | 0.04                         | $7.95 \times 10^{-01}$ |
| 33. % cropland harvested for fruits/veg [28]                       | 0.18                          | $2.58 \times 10^{-01}$ | -0.53                       | $2.90 \times 10^{-04}$ | -0.04                        | $7.95 \times 10^{-01}$ |
| 34. Conscientiousness Big Five personality trait [31]              | -0.1                          | $5.31 \times 10^{-01}$ | 0.14                        | $3.97 \times 10^{-01}$ | -0.05                        | $7.78 \times 10^{-01}$ |
| 35. % census tracts, healthy food retailer within 1/2 mile [28]    | -0.06                         | $7.41 \times 10^{-01}$ | -0.39                       | $1.09 \times 10^{-02}$ | -0.24                        | $1.28 \times 10^{-01}$ |
| 36. George Mason overall freedom ranking [33] (lower is freer)     | -0.02                         | $8.82 \times 10^{-01}$ | -0.05                       | $7.73 \times 10^{-01}$ | -0.1                         | $5.58 \times 10^{-01}$ |
| 37. Agreeableness Big Five personality trait [31]                  | 0                             | $9.85 \times 10^{-01}$ | 0.24                        | $1.26 \times 10^{-01}$ | 0.08                         | $6.41 \times 10^{-01}$ |

**S3 Table. Identical to Tab. 1 but including liquids and using a caloric difference rather than caloric ratio.** Spearman correlation coefficients,  $\hat{\rho}_s$ , and Benjamini-Hochberg  $q$ -values for caloric input  $C_{in}$ , caloric output  $C_{out}$ , and caloric difference  $C_{diff}(\alpha) = \alpha C_{out} + (1 - \alpha)C_{in}$  and demographic data related to food and physical activity, Big Five personality traits [31], health and well-being rankings by state, and socioeconomic status, correlated, ordered from strongest to weakest Spearman correlations with caloric ratio. We chose  $\alpha$  so that the average of  $C_{out}$  matched the average of  $\alpha C_{in}$ .
